# Supplementary material for: Increasing small molecule drug developability in sub-optimal chemical space
Source: Royal Society of Chemistry journal article supplement (doi:10.1039/c3md00003f), 2013-01-01
Supplement: c3md00003f.xlsx [file c3md00003f.xlsx]

## Sheet: Descriptor mean values
			Greasy Not Large	Greasy Not Large	Large & Greasy	Large & Greasy	Not Large Not Greasy	Not Large Not Greasy	Large Not Greasy	Large Not Greasy
Descriptor	Comment	Type	Low developability	High developability	Low developability	High developability	Low developability	High developability	Low developability	High developability
LogD+Ar ring	ChemAxon cLogD7.4 + Aromatic ring count	Aromatic - composite	7.93	6.11	8.41	6.77	6.51	5	7.06	5.66
LogD+(Ar-sp3)	ChemAxon cLogD7.4 + (Ar-sp3)	Aromatic - composite	19.25	11.51	18.08	10.72	17.91	11.14	17.67	10.31
Ar-sp3	Aromatic atom count minus sp3 carbon atom count	Aromatic - composite	0.39	0.09	13.45	7.14	14.68	8.68	14.33	7.65
Fsp3	sp3 carbon atom count / total carbon atom count	Aliphatic	0.18	0.31	0.26	0.37	0.15	0.28	0.24	0.36
Ar/HA	Aromatic atom count / heavy atom count	Aromatic - composite	0.7	0.55	0.57	0.47	0.66	0.54	0.57	0.47
sp2 atom	sp2-hybridised atom count	Aromatic	19.42	16.13	23.46	20.46	19.52	15.7	23.22	19.37
Ar ring	Aromatic ring count	Aromatic	3.39	2.62	3.79	3.19	3.29	2.54	3.72	3.01
LogD	ChemAxon cLogD7.4	Lipophilic	4.54	3.49	4.62	3.58	3.22	2.46	3.34	2.66
sp3 atom	sp3-hybridised atom count	Aliphatic	6.09	9.25	11.9	15.14	5.12	7.8	9.67	12.47
R2	Abraham's R2 (excess molar refraction) descriptor	Aromatic	2.81	2.39	3.43	3.07	2.82	2.39	3.51	3.03
Alpha	Abraham's Alpha (H-bond donor) descriptor	Polar	0.41	0.26	0.54	0.33	0.55	0.38	0.67	0.43
LogP	Daylight clog P value	Lipophilic	5	4.55	5.44	4.96	3.29	2.76	3.33	2.96
Non-Ar ring	Non-aromatic ring count	Aliphatic	0.44	0.85	0.94	1.52	0.4	0.67	0.9	1.32
Pi	Abraham's Pi (dipolarity/polarisability) descriptor	Polar	2.73	2.47	3.74	3.5	3.04	2.75	4.01	3.57
Arom Sulfur	Aromatic sulfur atom count	Atom counts	0.39	0.09	0.28	0.1	0.38	0.14	0.3	0.15
Het Ali ring	Heteroaliphatic ring count	Aliphatic	0.33	0.66	0.73	1.2	0.32	0.5	0.7	1
Car Aro ring	Carboaromatic ring count	Aromatic	1.96	1.69	2.29	2.01	1.52	1.23	1.86	1.44
HBD	H-bond donor count	Polar	1.21	0.91	1.68	1.12	1.47	1.21	1.83	1.37
Het Aro ring	Heteroaromatic ring count	Aromatic	1.43	0.92	1.5	1.19	1.76	1.31	1.86	1.56
Pos ionisable	Positive ionisable group count	Ionisable	0.1	0.36	0.33	0.66	0.08	0.2	0.16	0.28
Ring atom	Ring atom count	Atom counts	20.22	18.77	25.32	25.26	19.2	16.95	24.41	22.58
Sulfur	Sulfur atom count	Atom counts	0.49	0.16	0.63	0.36	0.54	0.31	0.82	0.47
Chiral atom	Chiral atom count	Aliphatic	0.24	0.61	0.64	0.97	0.16	0.42	0.32	0.77
fMF	Heavy atoms in the molecular framework / total heavy atoms	Flexibility	0.84	0.8	0.8	0.79	0.83	0.77	0.81	0.77
tPSA	Topological Polar Surface Area	Polar	56.17	52.71	85.41	76.38	76.09	72.21	102.25	92.61
Chain atom	Chain atom count	Flexibility	5.61	6.93	10.57	10.78	5.91	7.14	9.18	9.89
Mol Wt	Molecular weight	Size	363.65	356.98	511.8	508.83	355.42	338.27	479.59	459.91
Nitrogen	Nitrogen atom count	Atom counts	3.15	2.9	4.25	4	3.92	3.51	4.91	4.5
Mol Ref	Daylight molecular refractivity	Size	10.29	10.19	13.9	13.84	9.74	9.27	12.78	12.33
Heavy atom	Heavy atom count	Size	25.82	25.7	35.89	36.04	25.11	24.09	33.59	32.47
Car Ali ring	Carboaliphatic ring count	Aliphatic	0.11	0.19	0.21	0.32	0.08	0.16	0.2	0.32
Flexibility	(100 × Rotatable bond count)/total bond count	Flexibility	13.09	14.52	16.22	15.84	11.44	13.9	14.74	15.74
Oxygen	Oxygen atom count	Atom counts	1.21	1.56	2.64	2.75	1.74	1.97	2.99	3.09
BetaH	Abraham's BetaH (H-bond acceptor) descriptor	Polar	1.36	1.5	2.09	2.28	1.55	1.59	2.21	2.24
Chlorine	Chlorine atom count	Atom counts	0.38	0.29	0.46	0.36	0.36	0.18	0.3	0.24
Neg ionisable	Negative ionisable group count	Ionisable	0.02	0.01	0.11	0.06	0.02	0.02	0.15	0.08
Carbon	Carbon atom count	Atom counts	20.14	20.4	26.82	27.3	18.22	17.67	23.78	23.44
HBA	H-bond acceptor count	Polar	4.36	4.47	6.89	6.75	5.66	5.47	7.9	7.59
Rot bond	Rotatable bond count	Flexibility	3.83	4.22	6.64	6.49	3.32	3.8	5.66	5.76
Fluorine	Fluorine atom count	Atom counts	0.42	0.36	1.02	1.24	0.29	0.42	0.74	0.68
Green cells = Higher values correlate with lower developability; Red cells = Lower values correlate with lower developability; White cells = No significant difference in values between low and high developability

## Sheet: Descriptor VIP values
					Large & Greasy			Greasy Not Large			Large Not Greasy			Not Large Not Greasy
	Descriptor	Comment	Type	Correlation with developability	VIP		VIP StdErr	VIP		VIP StdErr	VIP		VIP StdErr	VIP		VIP StdErr		Avg
	LogD+Ar ring	ChemAxon cLogD7.4 + Aromatic ring count	Aromatic - composite	Negative	2.035	±	0.0401665	1.887	±	0.0689817	1.633	±	0.07	1.76	±	0.08	1.82875	1.82875
	cLogD+(aring-naring)	cLogD+(aring-naring)	Aromatic - composite	Negative	2.07136	±	0.0367917	1.87602	±	0.103819	1.67936	±	0.0916661	1.73405	±	0.0839898	1.8402	1.8402
	LogD+(Ar-sp3)	ChemAxon cLogD7.4 + (Ar-sp3)	Aromatic - composite	Negative	1.835	±	0.0334409	1.733	±	0.044	1.826	±	0.05	1.861	±	0.036	1.81375	1.81375
	Ar-sp3	Aromatic atom count minus sp3 carbon atom count	Aromatic - composite	Negative	1.654	±	0.031	1.59	±	0.063	1.737	±	0.049	1.737	±	0.05	1.6795	1.6795
	Fsp3	sp3 carbon atom count / total carbon atom count	Aliphatic	Positive	1.662	±	0.048	1.514	±	0.057	1.679	±	0.076	1.537	±	0.099	1.598	1.598
	Ar/HA	Aromatic atom count / heavy atom count	Aromatic - composite	Negative	1.599	±	0.045	1.52	±	0.084	1.561	±	0.099	1.333	±	0.088	1.50325	1.50325
	sp2 atom	sp2-hybridised atom count	Aromatic	Negative	1.246	±	0.037	1.313	±	0.072	1.689	±	0.047	1.646	±	0.075	1.4735	1.4735
	Ar ring	Aromatic ring count	Aromatic	Negative	1.251	±	0.056	1.379	±	0.078	1.498	±	0.072	1.594	±	0.058	1.4305	1.4305
	LogD	ChemAxon cLogD7.4	Lipophilic	Negative	1.834	±	0.039	1.582	±	0.035	1.009	±	0.114	1.096	±	0.12	1.38025	1.38025
	sp3 atom	sp3-hybridised atom count	Aliphatic	Positive	1.236	±	0.073	1.485	±	0.077	1.229	±	0.12	1.287	±	0.037	1.30925	1.30925
	R2	Abraham's R2 descriptor	Aromatic	Negative	1.007	±	0.081	1.264	±	0.131	1.546	±	0.076	1.37	±	0.069	1.29675	1.29675
	Alpha	Abraham's Alpha descriptor	Polar	Negative	1.124	±	0.103	0.823	±	0.112	1.394	±	0.087	1.116	±	0.156	1.11425	1.11425
	cLogP	Daylight cLogP	Lipophilic	Negative	1.068	±	0.154	1.173	±	0.147	0.875	±	0.089	1.131	±	0.117	1.06175	1.06175
	Non-Ar ring	Non-aromatic ring count	Aliphatic	Positive	1.275	±	0.075	1.08	±	0.134	0.768	±	0.185	0.675	±	0.162	0.9495	0.9495
	Pi	Abraham's Pi descriptor	Polar	Negative	0.507	±	0.087	0.899	±	0.12	1.269	±	0.09	1.007	±	0.106	0.9205	0.9205
	Arom sulfur	Aromatic sulfur atom count	Atom counts	Negative	0.76	±	0.085	0.958	±	0.151	0.751	±	0.067	1.008	±	0.223	0.86925	0.86925
	Het Ali ring	Heteroaliphatic ring count	Aliphatic	Positive	1.207	±	0.068	0.976	±	0.152	0.719	±	0.18	0.567	±	0.166	0.86725	0.86725
	Car Aro ring	Benzene ring count	Aromatic	Negative	0.842	±	0.097	0.715	±	0.163	1.052	±	0.093	0.824	±	0.173	0.85825	0.85825
	HBD	H-bond donor count	Polar	Negative	1.012	±	0.113	0.665	±	0.139	1.007	±	0.089	0.739	±	0.163	0.85575	0.85575
	Het Aro ring	Heteroaromatic ring count	Aromatic	Negative	0.65	±	0.119	1.021	±	0.07	0.59	±	0.115	0.911	±	0.129	0.825	0.825
	Pos ionisable	Positive ionisable group count	Ionisable	Positive	1.038	±	0.091	0.986	±	0.173	0.49	±	0.164	0.496	±	0.197	0.8095	0.8095
	Ring atom	Ring atom count	Atom counts	Negative	0.04	±	0.067	0.668	±	0.171	0.738	±	0.206	1.01	±	0.136	0.793	0.793
	Sulfur	Sulfur atom count	Atom counts	Negative	0.714	±	0.102	0.963	±	0.131	0.949	±	0.127	0.674	±	0.178	0.7525	0.7525
	Chiral atom	Chiral atom count	Aliphatic	Positive	0.605	±	0.118	0.994	±	0.171	0.843	±	0.099	0.796	±	0.119	0.614	0.614
	fMF	Heavy atoms in the molecular framework / total heavy atoms	Flexibility	Negative	0.414	±	0.098	0.639	±	0.158	0.607	±	0.178	0.779	±	0.157	0.46275	0.46275
	tPSA	Topological Polar Surface Area	Polar	Negative	0.578	±	0.141	0.338	±	0.185	0.858	±	0.068	0.541	±	0.139	0.45125	0.45125
	Chain atom	Chain atom count	Flexibility	Positive	0.183	±	0.115	0.765	±	0.172	0.367	±	0.134	0.566	±	0.143	0.403	0.403
	Mol Wt	Molecular weight	Size	Negative	0.013	±	0.05	0.352	±	0.208	0.678	±	0.159	0.808	±	0.106	0.36425	0.36425
	Nitrogen	Nitrogen atom count	Atom counts	Negative	0.29	±	0.045	0.372	±	0.151	0.541	±	0.138	0.602	±	0.101	0.3625	0.3625
	Mol Ref	Daylight molecular refractivity	Size	Negative	0.01	±	0.058	0.21	±	0.17	0.614	±	0.176	0.778	±	0.123	0.355	0.355
	Heavy atom	Heavy atom count	Size	Negative	0.092	±	0.071	0.127	±	0.16	0.544	±	0.174	0.694	±	0.093	0.3245	0.3245
	Car Ali ring	Carboaliphatic ring count	Aliphatic	Positive	0.397	±	0.09	0.451	±	0.141	0.289	±	0.118	0.313	±	0.079	0.32125	0.32125
	Flexibility	(100 × Rotatable bond count)/total bond count	Flexibility	Positive	0.098	±	0.141	0.431	±	0.104	0.25	±	0.12	0.641	±	0.198	0.31925	0.31925
	Oxygen	Oxygen atom count	Atom counts	Positive	0.261	±	0.176	0.6	±	0.17	0.163	±	0.08	0.274	±	0.115	0.29825	0.29825
	BetaH	Abraham's BetaH descriptor	Polar	Positive	0.714	±	0.073	0.52	±	0.136	0.051	±	0.202	0	±	0.096	0.249	0.249
	Chlorine	Chlorine atom count	Atom counts	Negative	0.311	±	0.101	0.236	±	0.171	0.188	±	0.194	0.542	±	0.221	0.218	0.218
	Neg ionisable	Negative ionisable group count	Ionisable	Negative	0.325	±	0.062	0.133	±	0.121	0.543	±	0.175	0.192	±	0.201	0.20475	0.20475
	Carbon	Carbon atom count	Atom counts	Not significant	0.209	±	0.075	0.088	±	0.155	0.211	±	0.164	0.488	±	0.14	0.12975	0.12975
	HBA	H-bond acceptor count	Polar	Not significant	0.041	±	0.117	0.092	±	0.19	0.38	±	0.116	0.359	±	0.108
	Rot bonds	Rotatable bond count	Flexibility	Not significant	0.061	±	0.138	0.402	±	0.129	0.001	±	0.075	0.355	±	0.19
	Fluorine	Fluorine atom count	Atom counts	Not significant	0.265	±	0.086	0.054	±	0.136	0.008	±	0.054	0.192	±	0.174
	Green cells = VIP >1. Bold text = VIP >1 for all quadrants. Italic text = VIP >1 for 1, 2, or 3 quadrants.
